# Supplementary material for: Association and interaction of APOA5, BUD13, CETP, LIPA and health-related behavior with metabolic syndrome in a Taiwanese population
Source: PubMed Central journal article supplement (PMC5101796; doi:10.1038/srep36830), 2016-11-09
Supplement: srep36830-s1.pdf [file srep36830-s1.pdf]

Supplementary Information for

Association and interaction of *APOA5*, *BUD13*, *CETP*, *LIPA* and  
health-related behavior with metabolic syndrome in a Taiwanese population

Eugene Lin<sup>1,2,3</sup>, Po-Hsiu Kuo<sup>4</sup>, Yu-Li Liu<sup>5</sup>, Albert C. Yang<sup>6,7</sup>, Chung-Feng Kao<sup>8</sup>, Shih-Jen

Tsai<sup>6,7</sup>

<sup>1</sup>Graduate Institute of Biomedical Sciences, China Medical University, Taichung, Taiwan

<sup>2</sup>Vita Genomics, Inc., Taipei, Taiwan

<sup>3</sup>TickleFish Systems Corporation, Seattle, WA, USA

<sup>4</sup>Department of Public Health, Institute of Epidemiology and Preventive Medicine, National  
Taiwan University, Taipei, Taiwan

<sup>5</sup>Center for Neuropsychiatric Research, National Health Research Institutes, Miaoli County,  
Taiwan

<sup>6</sup>Department of Psychiatry, Taipei Veterans General Hospital, Taipei, Taiwan

<sup>7</sup>Division of Psychiatry, National Yang-Ming University, Taipei, Taiwan

<sup>8</sup>Department of Agronomy, College of Agriculture & Natural Resources, National Chung

Hsing University, Taichung, Taiwan

Corresponding author:

Dr. Eugene Lin, Vita Genomics, Inc, 7 Fl., No. 6, Sec. 1, Jung-Shing Road,

Wugu Shiang, Taipei, Taiwan

E-mail: [eugene.lin@vitagenomics.com](mailto:eugene.lin@vitagenomics.com)

Phone: (+ 886) 2-8976-9123 ext 7751

Fax: (+ 886) 2-8976-9523

or

Dr. Shih-Jen Tsai, Department of Psychiatry, Taipei Veterans General Hospital, No. 201,

Shih-Pai Road, Sec. 2, 11217, Taipei, Taiwan

E-mail: [tsai610913@gmail.com](mailto:tsai610913@gmail.com)

Phone: 886-2-2875 7027, ext. 276

Fax: 886-2-2872 5643

**Supplementary Table S1.** Odds ratio analysis after adjustment for covariates between the MetS and 82 SNPs in the *APOA5*, *APOC1*, *BRAP*, *BUDI3*, *CETP*, *LIPA*, *LPL*, *PLCG1*, and *ZPR1* genes.

| Gene         | CHR | SNP        | Alleles | P (Dominant)  | P (Additive)  | P (Recessive) |
|--------------|-----|------------|---------|---------------|---------------|---------------|
| <i>APOA5</i> | 11  | rs2266788  | G/A     | 0.6794        | 0.7721        | 0.8111        |
|              |     | rs662799   | C/T     | <b>0.0218</b> | <b>0.0086</b> | <b>0.0229</b> |
| <i>APOC1</i> | 19  | rs445925   | A/G     | 0.9888        | 0.0604        | 0.0581        |
|              |     | rs4420638  | G/A     | 0.2980        | 0.6755        | 0.7119        |
| <i>BRAP</i>  | 12  | rs3742001  | C/T     | 0.5105        | 0.5402        | 0.5228        |
|              |     | rs3782886  | C/T     | 0.9824        | 0.5829        | 0.5342        |
|              |     | rs12427276 | A/G     | 0.1719        | 0.7309        | 0.9831        |
| <i>BUDI3</i> | 11  | rs11556024 | A/G     | 0.4681        | 0.6404        | 0.6623        |
|              |     | rs77684111 | A/G     | 0.4973        | 0.3052        | 0.3164        |
|              |     | rs11216129 | A/C     | <b>0.0027</b> | 0.0532        | 0.1492        |
|              |     | rs2849179  | T/C     | <b>0.0318</b> | 0.3695        | 0.9217        |
|              |     | rs180327   | C/T     | 0.5484        | 0.5719        | 0.6540        |
|              |     | rs180326   | G/T     | 0.5924        | 0.8338        | 0.7603        |
|              |     | rs2075295  | C/T     | 0.1354        | 0.0690        | 0.1299        |
|              |     | rs3741301  | C/T     | 0.3437        | 0.5343        | 0.6648        |
|              |     | rs3741300  | A/G     | <b>0.0218</b> | 0.3305        | 0.9138        |
|              |     | rs10488698 | A/G     | 0.4433        | 0.7014        | 0.6847        |
|              |     | rs10790162 | A/G     | 0.6475        | 0.9216        | 0.9745        |
|              |     | rs1263149  | G/A     | 0.0900        | 0.1032        | 0.2772        |
|              |     | rs623908   | G/A     | <b>0.0027</b> | 0.2091        | 0.6357        |
| <i>CETP</i>  | 16  | rs4783961  | A/G     | 0.2905        | 0.2227        | 0.2722        |
|              |     | rs1800775  | C/A     | 0.9061        | 0.1253        | <b>0.0148</b> |
|              |     | rs711752   | A/G     | <b>0.0168</b> | 0.2400        | 0.8672        |

|             |    |            |     |               |               |               |
|-------------|----|------------|-----|---------------|---------------|---------------|
|             |    | rs1864163  | A/G | 0.3282        | 0.9689        | 0.9131        |
|             |    | rs7203984  | C/A | 0.8377        | 0.6332        | 0.6351        |
|             |    | rs11508026 | T/C | <b>0.0173</b> | 0.2607        | 0.5626        |
|             |    | rs820299   | G/A | 0.9387        | <b>0.0211</b> | <b>0.0015</b> |
|             |    | rs9939224  | T/G | 0.3042        | 0.8272        | 0.7595        |
|             |    | rs1532624  | A/C | <b>0.0138</b> | 0.5243        | 0.9856        |
|             |    | rs7499892  | T/C | <b>0.0134</b> | 0.3948        | 0.5287        |
|             |    | rs289715   | A/T | 0.8751        | 0.9693        | 0.9852        |
|             |    | rs75511668 | C/T | 0.3164        | 0.0921        | 0.1032        |
|             |    | rs289719   | T/C | 0.0905        | 0.5607        | 0.8849        |
|             |    | rs4784744  | G/A | <b>0.0205</b> | <b>0.0492</b> | 0.2325        |
|             |    | rs1800774  | T/C | 0.0730        | <b>0.0474</b> | 0.0572        |
|             |    | rs5882     | G/A | 0.5158        | 0.9762        | 0.5931        |
| <i>LIPA</i> | 10 | rs10749600 | G/A | 0.1530        | 0.0593        | 0.0675        |
|             |    | rs10509568 | A/G | 0.1248        | 0.9055        | 0.8956        |
|             |    | rs6586175  | A/G | 0.2912        | 0.2008        | 0.2187        |
|             |    | rs1556478  | C/T | 0.3575        | 0.1622        | 0.1822        |
|             |    | rs2297472  | G/A | 0.4766        | 0.2484        | 0.2715        |
|             |    | rs2254747  | C/T | 0.6932        | 0.0881        | 0.0851        |
|             |    | rs2254670  | C/T | 0.1714        | 0.0506        | 0.0566        |
|             |    | rs2071510  | G/T | 0.4131        | 0.9431        | 0.6198        |
|             |    | rs11203042 | C/T | 0.5724        | 0.6534        | 0.8244        |
|             |    | rs1041389  | T/C | 0.8461        | 0.5470        | 0.5148        |
|             |    | rs885561   | C/T | 0.9368        | 0.8186        | 0.7183        |
|             |    | rs1029074  | G/A | 0.3334        | 0.0808        | 0.0712        |
|             |    | rs1412444  | T/C | 0.0826        | <b>0.0097</b> | <b>0.0171</b> |
|             |    | rs2246828  | A/G | 0.3550        | 0.0926        | 0.1009        |
|             |    | rs928415   | A/G | 0.8885        | 0.9982        | 0.9982        |
|             |    | rs2250781  | A/C | 0.0605        | 0.0746        | 0.2512        |
| <i>LPL</i>  | 8  | rs3779788  | T/C | 0.0786        | 0.2992        | 0.3746        |
|             |    | rs74377536 | A/C | 0.9068        | 0.5091        | 0.4530        |
|             |    | rs73667472 | C/T | 0.2233        | 0.7957        | 0.7671        |

|              |    |            |     |               |               |               |
|--------------|----|------------|-----|---------------|---------------|---------------|
|              |    | rs249      | C/T | 0.3525        | 0.6624        | 0.6781        |
|              |    | rs253      | T/C | 0.2446        | 0.3742        | 0.5769        |
|              |    | rs254      | G/C | 0.1749        | 0.0800        | 0.1034        |
|              |    | rs268      | G/A | 0.8887        | 0.8481        | 0.8420        |
|              |    | rs270      | A/C | 0.5146        | 0.8274        | 0.8651        |
|              |    | rs271      | A/G | 0.1886        | <b>0.0318</b> | <b>0.0395</b> |
|              |    | rs281      | T/A | 0.6318        | 0.4198        | 0.3167        |
|              |    | rs283      | T/C | 0.7962        | 0.8774        | 0.8670        |
|              |    | rs295      | C/A | 0.1193        | <b>0.0351</b> | <b>0.0463</b> |
|              |    | rs301      | C/T | 0.1274        | 0.0666        | 0.0875        |
|              |    | rs316      | A/C | 0.9641        | 0.8299        | 0.8263        |
|              |    | rs319      | C/A | 0.7126        | 0.2166        | 0.1871        |
|              |    | rs325      | C/T | <b>0.0131</b> | 0.1124        | 0.1350        |
|              |    | rs326      | G/A | 0.1216        | <b>0.0483</b> | 0.0636        |
|              |    | rs327      | G/T | 0.0900        | 0.0658        | 0.0913        |
|              |    | rs328      | G/C | <b>0.0119</b> | 0.1113        | 0.1342        |
|              |    | rs10099160 | G/T | 0.9274        | 0.2694        | 0.2563        |
|              |    | rs1059507  | T/C | 0.8759        | 0.9110        | 0.9157        |
|              |    | rs13702    | C/T | 0.1200        | 0.0911        | 0.1199        |
|              |    | rs15285    | T/C | 0.1300        | 0.0644        | 0.0835        |
| <i>PLCG1</i> | 20 | rs77440706 | C/T | 0.7239        | 0.2559        | 0.2579        |
|              |    | rs2066906  | A/G | 0.6052        | 0.1720        | 0.1045        |
| <i>ZPRI</i>  | 11 | rs964184   | G/C | 0.6671        | 0.8247        | 0.8695        |
|              |    | rs6589566  | G/A | 0.6316        | 0.5139        | 0.5400        |
|              |    | rs2075290  | C/T | 0.8816        | 0.7943        | 0.7612        |
|              |    | rs603446   | T/C | 0.4093        | 0.6893        | 0.8240        |
|              |    | rs3741298  | C/T | 0.6640        | 0.2783        | 0.2532        |

Chr = chromosome, MetS = metabolic syndrome.

Analysis was obtained after adjustment for covariates including age, gender, smoking, alcohol consumption, and physical activity. P values of < 0.05 are shown in bold.

**Supplementary Table S2.** Pairwise LD measures for SNPs with strong LD ( $r^2 > 0.8$ ).

| Gene         | CHR | SNP 1      | SNP 2      | $r^2$ |
|--------------|-----|------------|------------|-------|
| <i>BUD13</i> | 11  | rs11556024 | rs77684111 | 0.99  |
|              |     | rs2849179  | rs3741300  | 0.97  |
|              |     | rs180326   | rs10790162 | 0.91  |
|              |     | rs2075295  | rs1263149  | 0.94  |
| <i>CETP</i>  | 16  | rs1864163  | rs9939224  | 0.88  |
|              |     | rs11508026 | rs1532624  | 0.91  |
| <i>LIPA</i>  | 10  | rs10749600 | rs6586175  | 0.84  |
|              |     | rs10749600 | rs2254670  | 0.87  |
|              |     | rs6586175  | rs2254670  | 0.86  |
|              |     | rs1556478  | rs2297472  | 0.82  |
|              |     | rs11203042 | rs885561   | 0.88  |
| <i>LPL</i>   | 8   | rs73667472 | rs249      | 0.89  |
|              |     | rs254      | rs271      | 0.99  |
|              |     | rs283      | rs319      | 0.80  |
|              |     | rs295      | rs301      | 0.99  |
|              |     | rs295      | rs326      | 0.99  |
|              |     | rs295      | rs327      | 0.98  |
|              |     | rs301      | rs326      | 0.99  |
|              |     | rs301      | rs327      | 0.98  |
|              |     | rs301      | rs13702    | 0.95  |
|              |     | rs316      | rs1059507  | 0.93  |
|              |     | rs319      | rs10099160 | 0.92  |
|              |     | rs325      | rs328      | 1.00  |
|              |     | rs326      | rs327      | 0.99  |
|              |     | rs326      | rs13702    | 0.96  |
|              |     | rs326      | rs15285    | 0.96  |
|              |     | rs327      | rs13702    | 0.95  |

|             |    |           |           |      |
|-------------|----|-----------|-----------|------|
|             |    | rs327     | rs15285   | 0.95 |
|             |    | rs13702   | rs15285   | 1.00 |
| <i>ZPR1</i> | 11 | rs964184  | rs6589566 | 0.97 |
|             |    | rs964184  | rs2075290 | 0.91 |
|             |    | rs6589566 | rs2075290 | 0.88 |

---

Chr = chromosome, LD = linkage disequilibrium, MetS = metabolic syndrome.

**Supplementary Table S3.** Multivariable logistic regression analysis for the two-way gene-environment interaction models.

| Two-way interaction model                                                        | OR   | 95% CI    | P value <sup>b</sup>  |
|----------------------------------------------------------------------------------|------|-----------|-----------------------|
| <b>(a) MetS</b>                                                                  |      |           |                       |
| Non-smokers with<br><i>BUD13</i> rs623908 (AA genotype) <sup>a</sup>             | 1    |           |                       |
| Smokers with<br><i>BUD13</i> rs623908 (AA genotype)                              | 1.53 | 1.00-2.33 | 0.0516                |
| Non-smokers with<br><i>BUD13</i> rs623908 (GA+GG genotype)                       | 0.71 | 0.58-0.87 | 0.0012                |
| Smokers with<br><i>BUD13</i> rs623908 (GA+GG genotype)                           | 1.61 | 1.09-2.39 | 0.0175                |
| <b>(b) High waist circumference<sup>c</sup></b>                                  |      |           |                       |
| <i>CETP</i> rs820299 (AA+GA genotype)<br>and high physical activity <sup>a</sup> | 1    |           |                       |
| <i>CETP</i> rs820299 (AA+GA genotype)<br>and low physical activity               | 1.20 | 1.01-1.43 | 0.0410                |
| <i>CETP</i> rs820299 (GG genotype)<br>and high physical activity                 | 1.25 | 0.92-1.70 | 0.1458                |
| <i>CETP</i> rs820299 (GG genotype)<br>and low physical activity                  | 1.44 | 1.10-1.87 | 0.0073                |
| <b>(c) High triglyceride<sup>d</sup></b>                                         |      |           |                       |
| Non-smokers with<br><i>APOA5</i> rs662799 (TT genotype) <sup>a</sup>             | 1    |           |                       |
| Smokers with<br><i>APOA5</i> rs662799 (TT genotype)                              | 1.81 | 1.26-2.62 | 0.0014                |
| Non-smokers with<br><i>APOA5</i> rs662799 (CT+CC genotype)                       | 1.93 | 1.58-2.36 | 1.0x10 <sup>-10</sup> |
| Smokers with<br><i>APOA5</i> rs662799 (CT+CC genotype)                           | 3.42 | 2.35-4.97 | 1.3x10 <sup>-10</sup> |



*APOA5* rs662799 (CT+CC genotype)

(d) Low HDL<sup>e</sup>

|                                                                      |      |           |                      |
|----------------------------------------------------------------------|------|-----------|----------------------|
| Non-smokers with<br><i>APOA5</i> rs662799 (TT genotype) <sup>a</sup> | 1    |           |                      |
| Smokers with<br><i>APOA5</i> rs662799 (TT genotype)                  | 1.99 | 1.37-2.90 | 0.0003               |
| Non-smokers with<br><i>APOA5</i> rs662799 (CT+CC genotype)           | 1.49 | 1.25-1.79 | 1.5x10 <sup>-5</sup> |
| Smokers with<br><i>APOA5</i> rs662799 (CT+CC genotype)               | 2.62 | 1.77-3.86 | 1.3x10 <sup>-6</sup> |

CI = confidence interval, MetS = metabolic syndrome, OR = odds ratio.

<sup>a</sup> Reference.

<sup>b</sup> Versus reference. Analysis was obtained after adjustment for covariates including age and gender.

<sup>c</sup> Waist circumference  $\geq 90$  cm in male subjects, waist circumference  $\geq 80$  cm in female subjects.

<sup>d</sup> Triglyceride  $\geq 150$  mg/dl.

<sup>e</sup> HDL < 40 mg/dl in male subjects, HDL < 50 mg/dl in female subjects.
